# Supplementary material for: Review of Stereotactic Arrhythmia Radioablation Therapy for Cardiac Tachydysrhythmias
Source: PubMed Central journal article supplement — CJC Open. 2020 Nov 13;3(3):236–47. doi: 10.1016/j.cjco.2020.11.006 (PMC7984992; doi:10.1016/j.cjco.2020.11.006), 2020-11-13
Supplement: mmc1.pdf [file mmc1.pdf]

**Supplementary Table S1: Pre-clinical, proof of concept studies for ionizing radiation for cardiac tachydysrhythmias**

| Study                                                | Study Size                                               | Radiation dose                                                                                                           | Radiation Time                                                              | Results                                                                                                                                                                                                                                                                                                                                                                                          | Complications/Safety                                                                                                                       | Pathology                                                                                                                                                                                                                                                     |
|------------------------------------------------------|----------------------------------------------------------|--------------------------------------------------------------------------------------------------------------------------|-----------------------------------------------------------------------------|--------------------------------------------------------------------------------------------------------------------------------------------------------------------------------------------------------------------------------------------------------------------------------------------------------------------------------------------------------------------------------------------------|--------------------------------------------------------------------------------------------------------------------------------------------|---------------------------------------------------------------------------------------------------------------------------------------------------------------------------------------------------------------------------------------------------------------|
| <b>Pulmonary Vein Isolation</b>                      |                                                          |                                                                                                                          |                                                                             |                                                                                                                                                                                                                                                                                                                                                                                                  |                                                                                                                                            |                                                                                                                                                                                                                                                               |
| Perez-Castellano <i>et al.</i> 2006                  | 10 mini swine                                            | Purposefully non-circumferential ablation of right superior pulmonary artery trunk at 60 Gy using brachytherapy catheter | 359±157 sec                                                                 | Successful delivery of radiation with necrosis and fibrosis visualized in the pulmonary vein. Decreased local electrogram voltage and increased pacing threshold at ablated site at 81±27 days.<br>No change in bidirectional PV-LA conduction with noncircumferential ablation. Burst pacing in PV induced nonsustained AF in 80% of animals at baseline and in 20% of animals after radiation. | None reported                                                                                                                              | N = 2 (immediately post ablation)<br>Acute effects of endothelial denudation covered by white thrombus, elastic lamina disruption, and PV sleeve necrosis.<br><br>N = 8 (81±27 days)<br>Late effects of neointimal hyperplasia and elastic lamina thickening. |
| Sharma <i>et al.</i> 2010                            | 2 mini swine - LAA<br>3 mini swine – left pulmonary vein | 32-80 Gy (LAA) / 38-40 Gy (PV) using X-ray beam irradiation                                                              | 60 minutes                                                                  | <u>Left Atrial Appendage:</u><br>Decreased local electrogram voltage at 38 Gy at 33 days.<br><u>Left Pulmonary Vein:</u><br>Decreased local electrogram voltage at PV-LA junction from 89-196 days (low frequency and low amplitude far field signal) and no local activation seen                                                                                                               | no pulmonary vein stenosis at post-mortem; no pulmonary HTN or changes on echo; normal histology of trachea and esophagus                  | well-circumscribed lesion with transmural loss of myocyte architecture and increased fibrin                                                                                                                                                                   |
| Gardner <i>et al.</i> 2012                           | 3 canine<br>1 swine                                      | 35 Gy (canine)<br>25 Gy (swine)<br>Delivered to the PV using x-rays (Cyberknife)                                         | not reported                                                                | In-vivo dose measurement using surgically implanted dosimeters. Measurement of radiation delivery to cardiac structures for PV vein isolation. Dose-to-volume plans for cardiac target of 10%                                                                                                                                                                                                    | Lower measured radiation exposure to the esophagus and epicardium of up to 25%.                                                            | Not reported                                                                                                                                                                                                                                                  |
| Blanck <i>et al.</i> , 2014                          | 9 mini-swine                                             | 17.5 to 35 Gy. Dose escalation study<br>X-ray (LINAC) to the right superior pulmonary vein                               | not reported                                                                | Transmural scarring of cardiac muscle noted with doses >32.5 Gy. Not complete circumferential scarring of the pulmonary vein.                                                                                                                                                                                                                                                                    | No superficial radiation damage and normal cardiac function.                                                                               | Fibrosis noted at doses >30 Gy increasing with radiation dose. Transmural scarring at doses >32.5 Gy. Fat tissue necrosis at doses >20 Gy.                                                                                                                    |
| Lehmann <i>et al.</i> 2016                           | 3 swine                                                  | 40-50 Gy to the right superior PV and LA junction using carbon ion irradiation                                           | 23.4±8.1                                                                    | Decreased local atrial electrogram voltage with disappearance of local atrial electrograms in one animal at 24 weeks                                                                                                                                                                                                                                                                             | preserved LVEF at 6 months                                                                                                                 | RSPV-LA junction at 6 months showed local hemorrhage, inflammation, and fibrosis                                                                                                                                                                              |
| Zeis <i>et al.</i> 2018                              | 17 canines<br>2 adult swine                              | 15, 20, 25 and 35 Gy to the right superior PV/LA junction using X-ray beam irradiation                                   | 69.5± 42.3 minutes                                                          | 11/11 treated with 25 or 35 Gy; 3/5 treated with 20 Gy; 0/2 treated with 15 Gy had full treatment effect (PV/LA junction entrance and exit block). 1/5 treated with 20 Gy; 1/2 treated with 15 Gy had partial treatment effect (low voltage local electrogram voltage and/or partial PV/LA junction block)                                                                                       | At 6 months: mild LV hypokinesis (3/19), trace MR (12/19), PV diameter decreased 30-35% (3/19), pericarditis (1/19), T wave changes (3/19) | circumferential transmural scar at the PV ablation site; LV infarct (1/19); no damage of pericardium, valves, coronary arteries, esophagus, phrenic nerves, lung parenchyma                                                                                   |
| <b>Cavo-tricuspid Isthmus</b>                        |                                                          |                                                                                                                          |                                                                             |                                                                                                                                                                                                                                                                                                                                                                                                  |                                                                                                                                            |                                                                                                                                                                                                                                                               |
| Sharma <i>et al.</i> 2010                            | 9 mini swine                                             | 32-80 Gy using X-ray beam irradiation                                                                                    | 60 minutes                                                                  | decreased local atrial electrogram voltage at all doses at 35-108 days; bidirectional block seen at 40 Gy in one animal at 30 days                                                                                                                                                                                                                                                               | normal histology of trachea and esophagus                                                                                                  | well-circumscribed lesion with transmural loss of myocyte architecture and fibrosis                                                                                                                                                                           |
| <b>AV Node</b>                                       |                                                          |                                                                                                                          |                                                                             |                                                                                                                                                                                                                                                                                                                                                                                                  |                                                                                                                                            |                                                                                                                                                                                                                                                               |
| Sharma <i>et al.</i> 2010                            | 2 mini swine                                             | 40-70 Gy using X-ray beam irradiation                                                                                    | 60 minutes                                                                  | third degree AV block at 49 days in one animal, the other sacrificed at 15 days                                                                                                                                                                                                                                                                                                                  | one animal euthanized early (15 days) secondary to pacemaker pocket infection                                                              | well-circumscribed lesion with transmural loss of myocyte architecture and fibrosis                                                                                                                                                                           |
| Lehmann <i>et al.</i> 2015                           | 4 swine (explanted hearts)<br>Langendorff perfused       | 70, 90, 160 Gy using Heavy ion $^{12}\text{C}$                                                                           | Not reported                                                                | 130 Gy caused disturbance of AV conduction and transitioned into complete heart block                                                                                                                                                                                                                                                                                                            | Ex-planted hearts, no reported complications.                                                                                              | No macroscopically visible damage to the triangle of Koch or parts of the AV septum. Hyper eosinophilia is present.                                                                                                                                           |
| Lehmann <i>et al.</i> 2016                           | 8 mini swine                                             | 25, 40, 55 Gy using carbon ion irradiation                                                                               | 25 Gy – 15.7 min<br>40 Gy - 7.3 min<br>55 Gy – 10.8 min                     | Irradiation with 40 and 55 Gy led to complete heart block in 2/6 appearing up to 17 weeks but one swine treated with 40 Gy re-established AV conduction; irradiation with 25 Gy was not effective in any animal                                                                                                                                                                                  | no damage observed in tissues of the coronary arteries, esophagus, trachea or phrenic nerves at 6 months                                   | macroscopic lesion was seen in animals treated with 55 and 40 Gy                                                                                                                                                                                              |
| Lehmann <i>et al.</i> 2017                           | 7 swine                                                  | 25, 40, 50, 55 Gy using photon beam irradiation                                                                          | 25 Gy – 9.9 min<br>40 Gy – 14.7 min<br>50 Gy - 19.9 min<br>55 Gy – 25.7 min | 6/6 developed third degree AV block at median 11.2 weeks; remaining animal died early of pacemaker infection; the one animal treated with 25 Gy only developed AV block during final catheter EP study.                                                                                                                                                                                          | no short term side effects were observed and no damage to the esophagus, phrenic nerve or trachea                                          | histology revealed dense fibrosis at 3 months                                                                                                                                                                                                                 |
| Refaat <i>et al.</i> 2017                            | 5 swine                                                  | 35-40 Gy using LINAC                                                                                                     | 15 min                                                                      | Development of complete AV block from 55-235 days in all 5 swine.                                                                                                                                                                                                                                                                                                                                | No evidence of damage to surrounding tissue by histology.                                                                                  | Histology of AV node – severe architectural disruption with loss of smooth cellular organization.                                                                                                                                                             |
| <b>LV Free wall</b>                                  |                                                          |                                                                                                                          |                                                                             |                                                                                                                                                                                                                                                                                                                                                                                                  |                                                                                                                                            |                                                                                                                                                                                                                                                               |
| Amino <i>et al.</i> 2006<br>Amino <i>et al.</i> 2010 | 24 rabbits                                               | 15 Gy heavy ion beam                                                                                                     | Not reported                                                                | Increase of connexin43 mRNA and protein levels. Epicardial potential mapping of the free wall with reduced conduction velocity.                                                                                                                                                                                                                                                                  | 1 year follow up, no significant changes in ECGs and echocardiogram. No evidence of late radiation injury                                  | Significant upregulation of connexin43 protein and mRNA                                                                                                                                                                                                       |
| Lehmann <i>et al.</i> 2016                           | 3 mini swine                                             | 40 Gy using carbon ion irradiation                                                                                       | 22.9±8.6 min                                                                | epicardial mapping revealed clustering of fragmented electrogram potentials without significant voltage loss                                                                                                                                                                                                                                                                                     | echo displayed a circumscribed area of hyperechoic myocardium at the LV free wall                                                          | irradiated tissue displayed target fibrosis, cardiomyocyte disarray and hemorrhage                                                                                                                                                                            |
| Amino <i>et al.</i> 2017                             | 4 canines                                                | 15 Gy $^{12}\text{C}$ heavy ion beam                                                                                     | Not reported                                                                | Normalization of QRS duration compared in canine's with myocardial infarction treated with radiation. Decreased inducibility of VT/VF by 25%. Immunostaining of connexin43 significantly increased at 1 year.                                                                                                                                                                                    | Skin reactions n=2, desquamation reaction and skin ulcers with alopecia. No echo changes or death                                          | Immunostaining of connexin43 significantly increased at 1 year.                                                                                                                                                                                               |
| Hohmann <i>et al.</i> 2019                           | 20 swine                                                 | Proton beam<br>40 Gy at 1 site n = 8<br>30 Gy at 2 sites n = 4<br>40 Gy at 3 sites n = 8 (Anterior, inferior, apex)      | 9.2 ± 2.4 min                                                               | High dose multi site radiation resulted in LV dilation and impairment of LV function. Changes seen up to 3 months.                                                                                                                                                                                                                                                                               | 6 died during follow-up from 40 Gy 3 site treatment (>60 days). No apparent cause on pathology. Reduction in LV function and LV dilation.  | 16 weeks – increased collagen reflecting fibrosis with necrotic tissue, vacuolar degeneration and myocytolysis                                                                                                                                                |
